# Supplementary material for: Genomic Analysis and Comparison of Two Gonorrhea Outbreaks
Source: PubMed Central journal article supplement (PMC4937209; doi:10.1128/mbio.00525-16), 2016-06-28

I

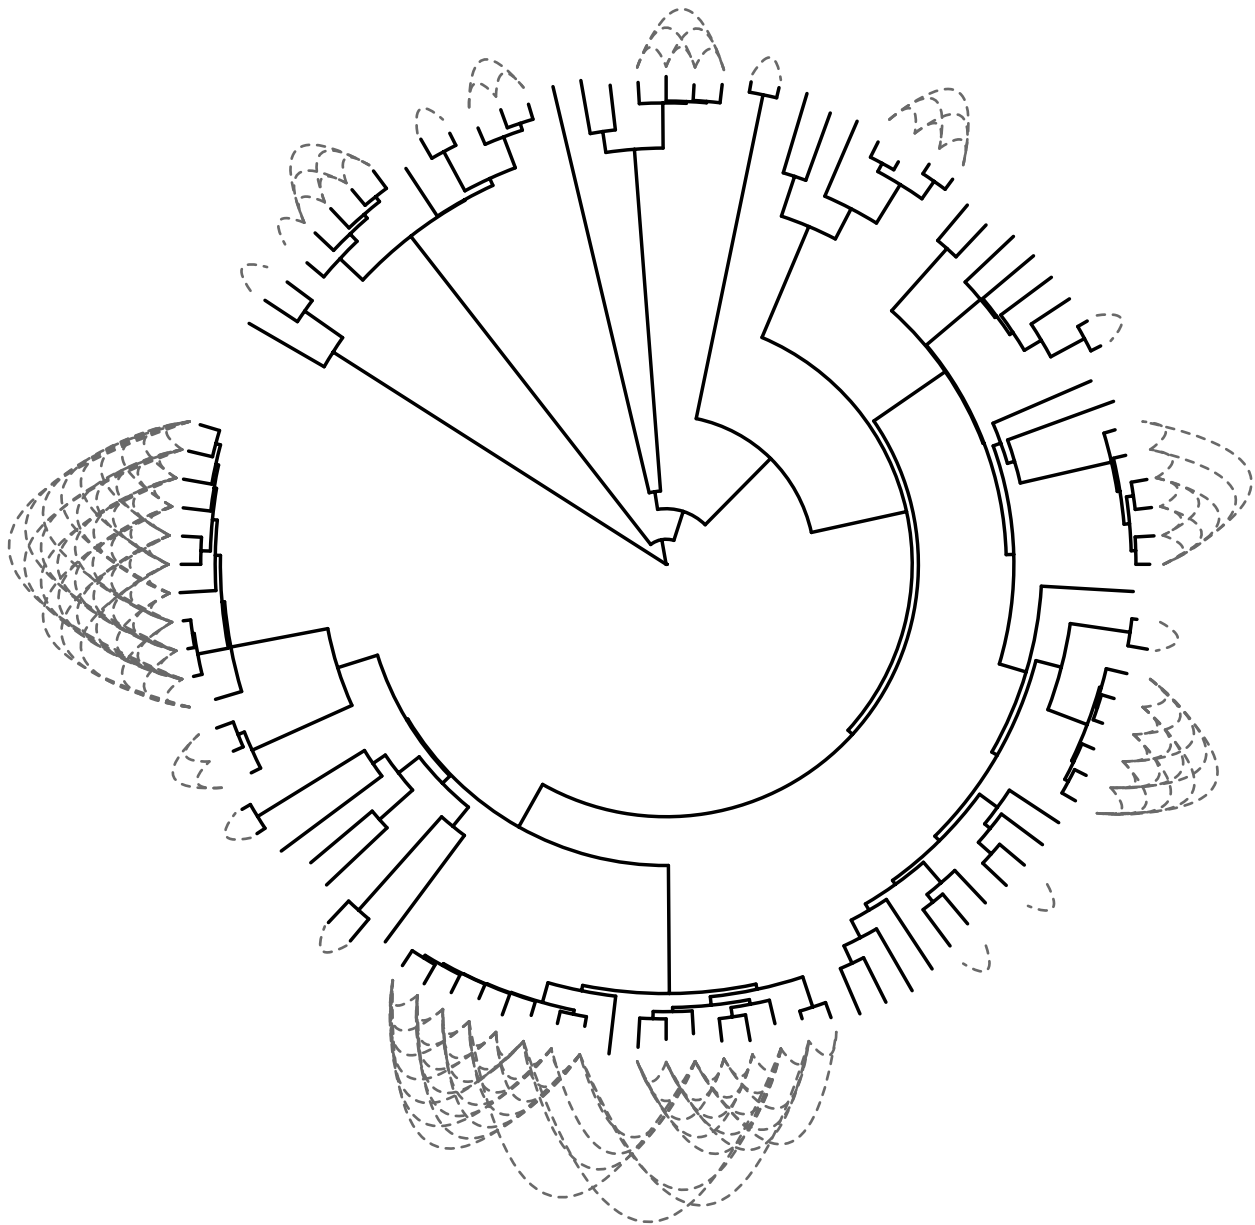

Supplement: mbo003162861sf6.pdf [file mbo003162861sf6.pdf]
