# Supplementary material for: Genomic Analysis and Comparison of Two Gonorrhea Outbreaks
Source: PubMed Central journal article supplement (PMC4937209; doi:10.1128/mbio.00525-16), 2016-06-28
Supplement: mbo003162861st1.pdf [file mbo003162861st1.pdf]

| isolate | Date of isolation | No.Contigs | Total.Length | Tracing.information | Sanger.ID | Accession number |
|---------|-------------------|------------|--------------|---------------------|-----------|------------------|
| S073    | 20/10/1995        | 75         | 2111762      | Triplet S1          | 5505_5#3  | ERR029245        |
| S058    | 14/10/1995        | 78         | 2113385      | Triplet S1          | 5505_5#2  | ERR029244        |
| S081    | 09/11/1995        | 81         | 2113731      | Triplet S1          | 5505_5#4  | ERR029246        |
| S079    | 08/11/1995        | 81         | 2112002      | -                   | 6649_6#10 | ERR049025        |
| S151    | 24/02/1996        | 79         | 2115765      | Pair S1             | 5505_5#9  | ERR029251        |
| S155    | 29/02/1996        | 82         | 2108072      | Pair S1             | 5505_5#10 | ERR029241        |
| S349    | 24/03/1997        | 90         | 2103094      | -                   | 6649_5#11 | ERR049047        |
| S427    | 06/10/1997        | 76         | 2113738      | -                   | 5505_7#9  | ERR029276        |
| S491    | 18/11/1997        | 94         | 2102613      | -                   | 6649_6#13 | ERR049070        |
| NS008   | 30/06/1999        | 88         | 2105182      | -                   | 6649_4#1  | ERR049016        |
| S464    | 17/11/1997        | 83         | 2109212      | -                   | 6649_6#8  | ERR049065        |
| S522    | 11/12/1997        | 96         | 2114222      | Pair 6              | 5314_3#10 | ERR026601        |
| S517    | 05/12/1997        | 116        | 2113638      | Pair 6              | 5314_3#9  | ERR026609        |
| S526    | 23/12/1997        | 85         | 2105282      | -                   | 6649_6#21 | ERR049078        |
| S515    | 21/11/1997        | 78         | 2109105      | -                   | 6649_6#18 | ERR049075        |
| S414    | 10/06/1997        | 77         | 2110058      | -                   | 6648_1#10 | ERR049004        |
| S492    | 19/11/1997        | 85         | 2110479      | -                   | 6649_6#14 | ERR049071        |
| S446    | 16/12/1997        | 91         | 2111540      | -                   | 6649_6#2  | ERR049059        |
| NS028   | 08/09/1999        | 97         | 2103051      | -                   | 6649_4#2  | ERR049017        |
| NS056   | 01/12/1999        | 92         | 2109618      | -                   | 6649_4#5  | ERR049020        |
| S417    | 08/07/1997        | 78         | 2113283      | -                   | 6648_1#13 | ERR049007        |
| S382    | 23/06/1997        | 70         | 2116834      | -                   | 6648_1#3  | ERR048997        |
| S465    | 17/11/1997        | 94         | 2102252      | -                   | 6649_6#9  | ERR049066        |
| S373    | 13/05/1997        | 88         | 2111770      | -                   | 6649_5#20 | ERR049056        |
| S366    | 25/04/1997        | 85         | 2110323      | -                   | 6649_5#18 | ERR049054        |
| S368    | 28/04/1997        | 83         | 2110442      | -                   | 6649_5#19 | ERR049055        |
| S283    | 10/10/1996        | 90         | 2112582      | -                   | 5505_6#10 | ERR029254        |
| S255    | 23/08/1996        | 87         | 2112439      | Quadruple S1        | 5505_6#5  | ERR029260        |
| S352    | 29/03/1997        | 82         | 2103588      | -                   | 6649_5#12 | ERR049048        |
| S360    | 09/04/1997        | 78         | 2110804      | -                   | 6649_5#15 | ERR049051        |
| S478    | 03/12/1997        | 80         | 2107795      | -                   | 6649_6#10 | ERR049067        |
| S474    | 17/12/1997        | 76         | 2111515      | -                   | 5505_7#10 | ERR029267        |
| S353    | 29/03/1997        | 83         | 2112608      | -                   | 6649_5#13 | ERR049049        |
| S306    | 10/12/1996        | 95         | 2110090      | Triplet 2           | 5314_3#1  | ERR026600        |
| S330    | 11/02/1997        | 88         | 2104244      | -                   | 6649_5#7  | ERR049043        |
| S349    | 08/10/1996        | 77         | 2113974      | -                   | 5505_6#9  | ERR029254        |
| S317    | 02/01/1997        | 89         | 2122882      | Triplet 2           | 5314_3#3  | ERR026603        |
| S308    | 04/01/1997        | 98         | 2119518      | Triplet 2           | 5314_3#2  | ERR026602        |
| S302    | 05/11/1996        | 75         | 2108045      | -                   | 5505_7#4  | ERR029271        |
| S288    | 15/10/1996        | 84         | 2107087      | Quadruple S1        | 5505_6#11 | ERR029255        |
| S290    | 02/11/1996        | 78         | 2129751      | -                   | 5505_7#1  | ERR029266        |
| S292    | 05/11/1996        | 77         | 2111586      | Quadruple S1        | 5505_7#2  | ERR029269        |
| S278    | 03/10/1996        | 80         | 2112258      | Quadruple S1        | 5505_6#7  | ERR029262        |
| S293    | 05/11/1996        | 79         | 2112521      | -                   | 5505_7#3  | ERR029270        |
| S387    | 04/07/1997        | 81         | 2126134      | -                   | 5505_7#8  | ERR029275        |
| S361    | 17/04/1997        | 83         | 2111321      | -                   | 6649_5#16 | ERR049052        |
| S380    | 26/04/1997        | 73         | 2115491      | -                   | 6648_1#2  | ERR048996        |
| S364    | 24/04/1997        | 91         | 2106443      | -                   | 6649_5#17 | ERR049053        |
| S416    | 27/06/1997        | 75         | 2115162      | -                   | 6648_1#12 | ERR049006        |
| S399    | 08/08/1997        | 79         | 2114559      | -                   | 6648_1#5  | ERR048999        |
| S509    | 23/10/1997        | 89         | 2106845      | -                   | 6649_6#16 | ERR049073        |
| S453    | 16/10/1997        | 84         | 2105740      | -                   | 6649_6#5  | ERR049062        |
| S481    | 16/10/1997        | 92         | 2104773      | -                   | 6649_6#11 | ERR049068        |
| S433    | 07/10/1997        | 75         | 2118087      | -                   | 6648_1#20 | ERR049014        |
| S418    | 08/08/1997        | 77         | 2114367      | -                   | 6648_1#14 | ERR049008        |
| S405    | 30/07/1997        | 107        | 2095201      | -                   | 6648_1#7  | ERR049001        |
| S449    | 01/08/1997        | 98         | 2098551      | -                   | 6649_6#4  | ERR049051        |
| NS031   | 27/09/1999        | 81         | 2103466      | -                   | 6649_4#3  | ERR049018        |
| NS055   | 01/12/1999        | 72         | 2111705      | -                   | 6649_4#4  | ERR049019        |
| S438    | 11/11/1997        | 80         | 2111745      | -                   | 6648_1#21 | ERR049015        |
| S488    | 11/11/1997        | 74         | 2110505      | -                   | 6649_6#12 | ERR049069        |
| S458    | 29/10/1997        | 89         | 2111237      | -                   | 6649_6#6  | ERR049063        |
| S461    | 10/11/1997        | 92         | 2104525      | -                   | 6649_6#7  | ERR049064        |
| S511    | 07/11/1997        | 105        | 2098748      | -                   | 6649_6#17 | ERR049074        |
| S406    | 25/09/1997        | 73         | 2118126      | -                   | 6648_1#8  | ERR049002        |
| S415    | 27/06/1997        | 82         | 2110377      | -                   | 6648_1#11 | ERR049005        |
| S339    | 10/01/1997        | 100        | 2097288      | -                   | 6649_5#9  | ERR049045        |
| S346    | 24/02/1997        | 92         | 2101432      | -                   | 6649_5#10 | ERR049046        |
| S320    | 05/02/1997        | 90         | 2109951      | -                   | 6649_5#5  | ERR049041        |
| S311    | 13/01/1997        | 88         | 2104304      | -                   | 6649_5#2  | ERR049038        |
| S378    | 09/05/1997        | 73         | 2115886      | -                   | 6648_1#1  | ERR048995        |
| S276    | 27/09/1996        | 78         | 2131389      | -                   | 5505_6#6  | ERR029261        |
| S419    | 13/06/1997        | 79         | 2115592      | -                   | 6648_1#15 | ERR049009        |
| S358    | 08/04/1997        | 90         | 2106271      | -                   | 6649_5#14 | ERR049050        |
| S350    | 08/04/1997        | 78         | 2116621      | -                   | 5505_7#6  | ERR029273        |
| S359    | 04/08/1997        | 81         | 2109899      | -                   | 5505_7#7  | ERR029274        |
| S310    | 06/01/1997        | 84         | 2106568      | -                   | 6649_5#1  | ERR049037        |
| S377    | 13/05/1997        | 89         | 2104959      | -                   | 6649_5#21 | ERR049057        |
| S514    | 21/11/1997        | 100        | 2113691      | Pair 5              | 5314_3#8  | ERR026608        |
| S493    | 20/11/1997        | 118        | 2110210      | Pair 5              | 5314_3#7  | ERR026607        |
| S343    | 18/02/1997        | 79         | 2111201      | -                   | 5505_7#5  | ERR029272        |
| S280    | 07/10/1996        | 81         | 2116936      | -                   | 5505_6#8  | ERR029263        |
| S508    | 22/10/1997        | 85         | 2117400      | -                   | 6649_6#15 | ERR049072        |
| S524    | 13/11/1997        | 90         | 2116505      | -                   | 6649_6#19 | ERR049076        |
| S463    | 11/11/1997        | 109        | 2114785      | Triplet 3           | 5314_3#5  | ERR026605        |
| S445    | 07/11/1997        | 100        | 2119392      | Triplet 3           | 5314_3#4  | ERR026604        |
| S466    | 19/11/1997        | 111        | 2116890      | Triplet 3           | 5314_3#6  | ERR026606        |
| NS301   | 02/03/2000        | 84         | 2114561      | -                   | 6649_4#6  | ERR049021        |
| NS105   | 22/03/2000        | 89         | 2106632      | -                   | 6649_4#7  | ERR049022        |
| S289    | 07/10/1996        | 75         | 2110594      | -                   | 5505_6#12 | ERR029256        |
| S424    | 08/08/1997        | 79         | 2114635      | -                   | 6648_1#17 | ERR049011        |
| S423    | 08/07/1997        | 76         | 2113662      | -                   | 6648_1#16 | ERR049010        |
| S397    | 18/07/1997        | 75         | 2116799      | -                   | 6648_1#4  | ERR048998        |
| S448    | 19/06/1997        | 84         | 2108932      | -                   | 6649_6#3  | ERR049060        |
| S407    | 25/06/1997        | 79         | 2111020      | -                   | 6648_1#9  | ERR049003        |
| S401    | 17/09/1997        | 82         | 2115212      | -                   | 6648_1#6  | ERR049000        |
| S525    | 26/09/1997        | 91         | 2102925      | -                   | 6649_6#20 | ERR049077        |
| S441    | 01/08/1997        | 87         | 2106987      | -                   | 6649_6#4  | ERR049058        |
| S430    | 02/07/1997        | 74         | 2119138      | -                   | 6648_1#19 | ERR049013        |
| S425    | 01/08/1997        | 79         | 2114458      | -                   | 6648_1#18 | ERR049012        |
| S329    | 07/02/1997        | 92         | 2104782      | -                   | 6649_5#6  | ERR049042        |
| S319    | 04/02/1997        | 91         | 2113179      | -                   | 6649_5#4  | ERR049040        |
| S316    | 18/12/1996        | 82         | 2112298      | -                   | 6649_5#3  | ERR049039        |
| S256    | 24/08/1996        | 103        | 2117616      | Pair 3              | 5314_2#10 | ERR026589        |
| S241    | 14/08/1996        | 99         | 2115158      | Pair 3              | 5314_2#8  | ERR026597        |
| S217    | 18/06/1996        | 76         | 2116203      | -                   | 5505_6#4  | ERR029259        |
| S184    | 18/04/1996        | 82         | 2117998      | -                   | 5505_5#12 | ERR029243        |
| S257    | 24/08/1996        | 105        | 2112756      | Pair 4              | 5314_2#11 | ERR026590        |
| S253    | 23/08/1996        | 105        | 2113861      | Pair 4              | 5314_2#9  | ERR026598        |
| S303    | 15/05/1996        | 94         | 2105176      | -                   | 6649_4#17 | ERR049022        |
| S207    | 22/05/1996        | 85         | 2117040      | -                   | 5505_6#3  | ERR029258        |
| S206    | 20/05/1996        | 84         | 2115544      | -                   | 5505_6#2  | ERR029257        |
| S153a   | 28/02/1996        | 80         | 2119409      | -                   | 6649_4#15 | ERR049030        |
| S152    | 28/02/1996        | 94         | 2113575      | Triplet1            | 5314_2#6  | ERR026595        |
| S154    | 29/02/1996        | 89         | 2117703      | Triplet1            | 5314_2#7  | ERR026596        |
| S158    | 29/02/1996        | 83         | 2115290      | -                   | 6649_4#16 | ERR049031        |
| S149    | 23/02/1996        | 92         | 2117858      | Triplet1            | 5314_2#5  | ERR026594        |
| S098    | 09/11/1995        | 92         | 2115728      | Pair 2              | 5314_2#3  | ERR026592        |
| S100    | 24/11/1995        | 106        | 2111754      | Pair 2              | 5314_2#4  | ERR026593        |
| S092    | 20/11/1995        | 91         | 2111791      | -                   | 6649_4#11 | ERR049026        |
| S106    | 01/12/1995        | 77         | 2120409      | -                   | 5505_5#5  | ERR029247        |
| S201    | 14/05/1996        | 80         | 2116178      | -                   | 5505_6#1  | ERR029253        |
| S163    | 09/03/1996        | 87         | 2114870      | -                   | 5505_5#11 | ERR029242        |
| S141    | 06/02/1996        | 82         | 2113214      | -                   | 5505_5#8  | ERR029250        |
| S142    | 06/02/1996        | 82         | 2110833      | -                   | 6649_4#14 | ERR049029        |
| S135    | 25/01/1996        | 84         | 2106984      | -                   | 5505_5#7  | ERR029249        |
| S105    | 01/12/1995        | 91         | 2100990      | -                   | 6649_4#13 | ERR049028        |
| S078    | 20/10/1995        | 104        | 2115489      | Pair 1              | 5314_2#1  | ERR026588        |
| S096    | 22/11/1995        | 88         | 2109963      | -                   | 6649_4#12 | ERR049027        |
| S086    | 09/11/1995        | 98         | 2113046      | Pair 1              | 5314_2#2  | ERR026591        |
| S041    | 08/08/1995        | 94         | 2105583      | -                   | 6649_4#8  | ERR049023        |
| S006    | 11/04/1995        | 77         | 2113804      | -                   | 5505_5#1  | ERR029240        |
