# Supplementary material for: Genomic Analysis and Comparison of Two Gonorrhea Outbreaks
Source: PubMed Central journal article supplement (PMC4937209; doi:10.1128/mbio.00525-16), 2016-06-28
Supplement: mbo003162861st2.pdf [file mbo003162861st2.pdf]

| strain | date_of_isolation | gender | Sexual_Orientation | HIV_Status   | Year_of_birth | Ethnicity          | OS_Partners | UK_Partners | Previous_Gonorrhoea | postcode | Sanger.ID | Accession number |           |
|--------|-------------------|--------|--------------------|--------------|---------------|--------------------|-------------|-------------|---------------------|----------|-----------|------------------|-----------|
| LG1291 | 27/09/2004        | M      | Homosexual         | HIV Negative | 1981          | White British      |             | 0           | 2                   | N        | SE25      | 8987 7H5         | ERR234417 |
| LG1834 | 17/11/2004        | M      | Bisexual           | Unknown      | 1976          | White British      |             | 0           | 2                   | N        |           | 8987 7H87        | ERR234499 |
| W0603  | 01/10/2004        | M      | Homosexual         | Unknown      | 1978          | White British      | NA          |             | 1                   | U        | SE38      | 8987 6H63        | ERR234397 |
| W0561  | 15/09/2004        | M      | Homosexual         | Unknown      | 1981          | Other Asian        |             | 2           | 3                   | N        | SE14      | 8987 6H57        | ERR234391 |
| W0789  | 28/10/2004        | M      | Homosexual         | HIV Positive | 1981          | White British      |             | 0           | 1                   | N        | E151      | 8987 6H75        | ERR234409 |
| W0613  | 29/09/2004        | M      | Homosexual         | Unknown      | 1981          | Other Asian        |             | 2           | 3                   | N        | SE14      | 8987 6H66        | ERR234400 |
| LG1721 | 15/11/2004        | M      | Homosexual         | Unknown      | 1960          | Other white        |             | 0           | 2                   | Y        | SW90      | 8987 7H7         | ERR234419 |
| LG0261 | 28/06/2004        | M      | Homosexual         | HIV Negative | 1985          | Other white        |             | 0           | 1                   | Y        |           | 8987 7H41        | ERR234453 |
| LG0394 | 12/07/2004        | M      | Homosexual         | HIV Negative | 1963          | White British      |             | 1           | 0                   | N        | NW6       | 8987 7H2         | ERR234414 |
| W0185  | 12/07/2004        | M      | Homosexual         | HIV Negative | 1977          | Other white        |             | 0           | 2                   | N        | N15       | 8987 7H40        | ERR234452 |
| LG0660 | 02/08/2004        | M      | Homosexual         | HIV Positive | 1952          | White British      |             | 2           | 8                   | Y        | WC1H      | 8987 7H90        | ERR234502 |
| LG1349 | 06/10/2004        | M      | Homosexual         | HIV Positive | 1976          | Other white        |             | 0           | 3                   | N        |           | 8987 7H45        | ERR234457 |
| LG1636 | 04/11/2004        | M      | Homosexual         | HIV Negative | 1957          | White British      |             | 0           | 4                   | Y        | SE37      | 8987 7H62        | ERR234474 |
| LG1635 | 04/11/2004        | M      | Homosexual         | HIV Negative | 1957          | White British      |             | 0           | 4                   | Y        | SE37      | 8987 7H54        | ERR234466 |
| LG1628 | 01/11/2004        | M      | Homosexual         | HIV Negative | 1969          | Other white        |             | 0           | 2                   | Y        | E17       | 8987 7H38        | ERR234450 |
| LG0931 | 24/08/2004        | M      | Homosexual         | HIV Negative | 1969          | White British      |             | 0           | 1                   | Y        | N28H      | 8987 7H75        | ERR234487 |
| W0065  | 08/06/2004        | M      | Homosexual         | HIV Negative | 1980          | White Irish        |             | 1           | 1                   | Y        | N227      | 8987 7H32        | ERR234444 |
| LG1375 | 08/10/2004        | F      | Heterosexual       | HIV Negative | 1974          | Other white        |             | 1           | 0                   | N        | N165      | 8987 7H61        | ERR234473 |
| LG1861 | 23/11/2004        | M      | Homosexual         | HIV Negative | 1986          | White British      |             | 0           | 0                   | N        | SM67      | 8987 7H16        | ERR234428 |
| LG1274 | 07/11/2004        | M      | Homosexual         | HIV Negative | 1982          | Other Ethnic Group |             | 9           | 0                   | Y        | W2        | 8987 7H84        | ERR234496 |
| LG1781 | 10/11/2004        | M      | Homosexual         | HIV Negative | 1982          | White British      |             | 0           | 1                   | N        | SE183     | 8987 7H63        | ERR234475 |
| LG0910 | 20/08/2004        | M      | Homosexual         | HIV Negative | 1982          | Other Ethnic Group |             | 9           | 0                   | Y        | W2        | 8987 7H67        | ERR234479 |
| LG0458 | 14/07/2004        | M      | Heterosexual       | HIV Negative | 1982          | White British      | NA          |             | 1                   | Y        | SE10      | 8987 7H10        | ERR234422 |
| LG0273 | 22/06/2004        | M      | Homosexual         | HIV Negative | 1977          | White British      | NA          |             | 3                   | N        | NW2 4     | 8987 7H49        | ERR234461 |
| LG0516 | 19/07/2004        | F      | Heterosexual       | Unknown      | 1978          | White British      |             | 0           | 1                   | N        | SE12      | 8987 7H42        | ERR234454 |
| LG0355 | 06/07/2004        | M      | Homosexual         | HIV Negative | 1982          | Other Ethnic Group |             | 2           | 0                   | Y        | SW2       | 8987 7H81        | ERR234493 |
| LG0353 | 06/07/2004        | M      | Homosexual         | HIV Negative | 1982          | Other Ethnic Group |             | 2           | 0                   | Y        | SW2       | 8987 7H73        | ERR234485 |
| W0251  | 15/07/2004        | M      | Homosexual         | HIV Negative | 1974          | Other Black        |             | 0           | 1                   | N        | WC2P      | 8987 7H64        | ERR234476 |
| LG1644 | 04/11/2004        | M      | Homosexual         | HIV Negative | 1981          | White British      |             | 0           | 2                   | Y        | E15       | 8987 7H70        | ERR234482 |
| LG0790 | 12/08/2004        | M      | Homosexual         | Unknown      | 1982          | White British      |             | 0           | 2                   | Y        | ME194     | 8987 7H51        | ERR234463 |
| LG0675 | 04/08/2004        | M      | Homosexual         | HIV Negative | 1982          | White British      | NA          |             | 3                   | N        | NW1       | 8987 7H19        | ERR234431 |
| W0239  | 20/07/2004        | M      | Homosexual         | HIV Negative | 1971          | White British      | NA          |             | 2                   | N        |           | 8987 7H56        | ERR234468 |
| LG0285 | 25/06/2004        | M      | Homosexual         | HIV Positive | 1973          | White British      | NA          |             | 6                   | Y        | SE114     | 8987 7H57        | ERR234469 |
| LG0735 | 09/08/2004        | M      | Homosexual         | Unknown      | 1980          | White Irish        |             | 0           | 2                   | N        | SE1       | 8987 7H35        | ERR234447 |
| LG0211 | 18/06/2004        | M      | Homosexual         | HIV Positive | 1966          | White British      | NA          |             | 100                 | Y        | E15       | 8987 7H25        | ERR234437 |
| W0204  | 06/07/2004        | M      | Homosexual         | HIV Negative | 1963          | Other Black        |             | 1           | 2                   | Y        | SE12      | 8987 7H48        | ERR234460 |
| LG0383 | 08/07/2004        | M      | Homosexual         | HIV Positive | 1983          | Other Ethnic Group | NA          |             | 1                   | N        | SW9 9     | 8987 7H89        | ERR234501 |
| W0604  | 01/10/2004        | M      | Homosexual         | Unknown      | 1969          | White British      | NA          |             | 2                   | U        | SE11      | 8987 6H64        | ERR234398 |
| W0761  | 21/10/2004        | M      | Homosexual         | Unknown      | 1971          | White Irish        | NA          |             | 1                   | N        | SE15      | 8987 6H72        | ERR234406 |
| W0751  | 21/10/2004        | M      | Homosexual         | HIV Negative | 1961          | White British      | NA          |             | 1                   | N        | N1 8      | 8987 6H71        | ERR234405 |
| W0587  | 17/09/2004        | M      | Homosexual         | HIV Negative | 1970          | Other white        |             | 0           | 2                   | N        | EC1V      | 8987 6H61        | ERR234395 |
| W0563  | 13/09/2004        | M      | Homosexual         | Unknown      | 1957          | White British      |             | 0           | 2                   | Y        | SW83      | 8987 6H58        | ERR234392 |
| W0420  | 01/09/2004        | M      | Homosexual         | Unknown      | 1967          | White British      |             | 0           | 1                   | N        | N88       | 8987 6H53        | ERR234387 |
| LG1850 | 26/11/2004        | M      | Homosexual         | HIV Negative | 1977          | Unknown            |             | 0           | 2                   | Y        | N15 6     | 8987 7H95        | ERR234507 |
| W0264  | 23/07/2004        | M      | Homosexual         | HIV Positive | 1973          | White British      |             | 0           | 2                   | Y        | E7        | 8987 7H80        | ERR234492 |
| LG1133 | 15/09/2004        | M      | Homosexual         | HIV Positive | 1977          | Other white        |             | 0           | 15                  | N        | N19       | 8987 7H44        | ERR234456 |
| LG1365 | 08/10/2004        | M      | Homosexual         | HIV Negative | 1970          | Other white        |             | 0           | 20                  | Y        | E 6       | 8987 7H53        | ERR234465 |
| LG1091 | 09/09/2004        | M      | Homosexual         | Unknown      | 1972          | Other white        |             | 0           | 1                   | N        | SW73      | 8987 7H4         | ERR234416 |
| LG0671 | 04/08/2004        | M      | Homosexual         | HIV Positive | 1960          | Other white        |             | 0           | 2                   | N        | IG26      | 8987 7H3         | ERR234415 |
| LG1094 | 10/09/2004        | M      | Homosexual         | HIV Positive | 1965          | White British      | NA          |             | 5                   | Y        | W86J      | 8987 7H12        | ERR234424 |
| LG0621 | 29/07/2004        | M      | Homosexual         | HIV Negative | 1971          | White British      |             | 0           | 1                   | N        | NW86      | 8987 7H66        | ERR234478 |
| LG0465 | 13/07/2004        | M      | Homosexual         | HIV Positive | 1969          | Other white        |             | 0           | 8                   | Y        | E2        | 8987 7H26        | ERR234438 |
| W0362  | 12/08/2004        | M      | Homosexual         | HIV Negative | 1978          | Unknown            |             | 0           | 2                   | Y        | EC1A      | 8987 6H51        | ERR234385 |
| W0569  | 27/09/2004        | M      | Heterosexual       | Unknown      | 1962          | Black African      |             | 0           | 3                   | Y        | SE16      | 8987 6H60        | ERR234394 |
| LG1346 | 05/10/2004        | M      | Homosexual         | HIV Negative | 1973          | White British      |             | 0           | 3                   | N        |           | 8987 7H29        | ERR234441 |
| LG0795 | 16/08/2004        | M      | Homosexual         | HIV Negative | 1976          | Other white        |             | 0           | 2                   | N        | NW10 5    | 8987 7H59        | ERR234471 |
| LG0493 | 19/07/2004        | M      | Homosexual         | HIV Negative | 1964          | White British      |             | 0           | 2                   | Y        |           | 8987 7H34        | ERR234446 |
| LG1126 | 13/09/2004        | M      | Homosexual         | HIV Positive | 1980          | White British      |             | 2           | 3                   | Y        | E83H      | 8987 7H28        | ERR234440 |
| LG1342 | 04/10/2004        | M      | Heterosexual       | Unknown      | 1963          | White British      |             | 1           | 1                   | N        | SW12      | 8987 7H21        | ERR234433 |
| W0296  | 30/07/2004        | M      | Homosexual         | Unknown      | 1974          | Other Ethnic Group |             | 0           | 3                   | U        | SE165     | 8987 7H88        | ERR234500 |
| LG0989 | 06/09/2004        | M      | Bisexual           | HIV Negative | 1979          | Other Ethnic Group | NA          |             | NA                  | N        | SW18      | 8987 7H83        | ERR234495 |
| LG0640 | 28/07/2004        | M      | Homosexual         | Unknown      | 1975          | White Irish        | NA          |             | 3                   | N        | E11       | 8987 7H82        | ERR234494 |
| LG0205 | 17/06/2004        | M      | Homosexual         | Unknown      | 1960          | Other Asian        |             | 2           | 6                   | N        | SW7       | 8987 7H17        | ERR234429 |
| W0725  | 21/10/2004        | M      | Homosexual         | Unknown      | 1971          | White British      |             | 0           | 1                   | Y        |           | 8987 6H69        | ERR234403 |
| W0762  | 18/10/2004        | M      | Homosexual         | HIV Positive | 1959          | White British      | NA          |             | 4                   | Y        | SE18      | 8987 6H73        | ERR234407 |
| W0749  | 18/10/2004        | M      | Bisexual           | Unknown      | 1978          | White British      | NA          |             | 2                   | N        | E1 8      | 8987 6H70        | ERR234404 |
| LG1423 | 11/10/2004        | M      | Homosexual         | Unknown      | 1962          | White British      |             | 1           | 2                   | N        | NW3       | 8987 7H69        | ERR234481 |
| LG1477 | 14/10/2004        | M      | Homosexual         | HIV Positive | 1970          | White British      |             | 0           | 5                   | Y        | NW1       | 8987 7H85        | ERR234497 |
| LG1548 | 22/10/2004        | M      | Homosexual         | HIV Positive | 1961          | Other white        | NA          |             | 2                   | Y        | SW84      | 8987 7H14        | ERR234426 |
| LG1810 | 16/11/2004        | M      | Homosexual         | HIV Positive | 1964          | White British      |             | 0           | 4                   | N        | N1        | 8987 7H79        | ERR234491 |
| LG1745 | 12/11/2004        | M      | Homosexual         | Unknown      | 1971          | Other white        | NA          |             | 4                   | Y        | SE26      | 8987 7H47        | ERR234459 |
| LG1580 | 21/10/2004        | M      | Homosexual         | HIV Positive | 1964          | White British      | NA          |             | 10                  | N        | SW9       | 8987 7H22        | ERR234434 |
| LG1619 | 25/10/2004        | M      | Unknown            | Unknown      | 1966          | Other Asian        |             | 0           | 7                   | N        | E3 4      | 8987 7H30        | ERR234442 |
| LG0541 | 22/07/2004        | M      | Homosexual         | HIV Negative | 1969          | White British      |             | 1           | 1                   | N        | RH1       | 8987 7H50        | ERR234462 |
| LG0186 | 15/06/2004        | M      | Homosexual         | HIV Positive | 1978          | White British      |             | 0           | 1                   | N        | SM        | 8987 7H1         | ERR234413 |
| LG0311 | 02/07/2004        | M      | Homosexual         | Unknown      | 1941          | White British      |             | 0           | 2                   | Y        | SW18      | 8987 7H65        | ERR234477 |
| LG1132 | 14/09/2004        | F      | Heterosexual       | Unknown      | 1953          | White British      |             | 1           | 1                   | N        | TQ6       | 8987 7H36        | ERR234448 |
| LG1739 | 10/11/2004        | M      | Homosexual         | HIV Negative | 1965          | White British      | NA          |             | 2                   | N        | W14       | 8987 7H31        | ERR234443 |
| LG1740 | 10/11/2004        | M      | Homosexual         | HIV Negative | 1965          | White British      | NA          |             | 2                   | N        | W14       | 8987 7H39        | ERR234451 |
| W0255  | 22/07/2004        | M      | Homosexual         | HIV Negative | 1978          | Pakistani          | NA          |             | 2                   | N        | UB40      | 8987 7H72        | ERR234484 |
| LG1865 | 24/11/2004        | M      | Homosexual         | Unknown      | 1969          | White British      |             | 0           | 1                   | N        | SG14      | 8987 7H24        | ERR234436 |
| W0885  | 19/11/2004        | M      | Homosexual         | HIV Negative | 1963          | White British      | NA          |             | 20                  | N        | SE14      | 8987 6H77        | ERR234411 |
| LG1137 | 15/09/2004        | M      | Homosexual         | Unknown      | 1970          | Black Caribbean    |             | 4           | 6                   | U        | SW52      | 8987 7H52        | ERR234464 |
| LG1799 | 18/11/2004        | M      | Homosexual         | HIV Negative | 1968          | Other Ethnic Group | NA          |             | 1                   | N        | SW1X      | 8987 7H71        | ERR234483 |
| LG1289 | 28/09/2004        | M      | Homosexual         | HIV Negative | 1982          | White British      |             | 3           | 7                   | N        | SW1V      | 8987 7H92        | ERR234504 |
| LG1197 | 14/09/2004        | M      | Bisexual           | Unknown      | 1980          | Indian             |             | 1           | 0                   | N        | E130      | 8987 7H60        | ERR234472 |
| LG1114 | 07/09/2004        | M      | Bisexual           | Unknown      | 1980          | Indian             |             | 1           | 0                   | N        | E130      | 8987 7H20        | ERR234432 |
| LG0199 | 18/06/2004        | M      | Homosexual         | Unknown      | 1981          | White British      |             | 0           | 4                   | N        | SW20      | 8987 7H9         | ERR234421 |
| LG0633 | 02/08/2004        | M      | Homosexual         | HIV Positive | 1967          | Other white        |             | 6           | 0                   | Y        | W10       | 8987 7H74        | ERR234486 |
| LG1737 | 09/11/2004        | M      | Homosexual         | HIV Negative | 1975          | White British      |             | 1           | 1                   | Y        | E175      | 8987 7H23        | ERR234435 |
| LG1736 | 09/11/2004        | M      | Homosexual         | HIV Negative | 1975          | White British      |             | 1           | 1                   | Y        | E175      | 8987 7H15        | ERR234427 |
| W0592  | 27/09/2004        | M      | Homosexual         | HIV Positive | 1965          | White British      | NA          |             | 3                   | Y        | N4 1      | 8987 6H62        | ERR234396 |
| LG1719 | 15/11/2004        | M      | Heterosexual       | HIV Negative | 1979          | Other white        |             | 2           | 0                   | N        | SE17      | 8987 7H94        | ERR234506 |
| W0560  | 15/09/2004        | M      | Homosexual         | Unknown      | 1981          | White British      |             | 0           | 1                   | N        | SE13      | 8987 6H56        | ERR234390 |
| W0627  | 05/10/2004        | M      | Homosexual         | HIV Positive | 1966          | White British      | NA          |             | 4                   | U        | E 8       | 8987 6H68        | ERR234402 |
| W0370  | 17/08/2004        | M      | Homosexual         | Unknown      | 1964          | White British      |             | 0           | 2                   | Y        | SE15      | 8987 6H52        | ERR234386 |
| LG0751 | 09/08/2004        | M      | Homosexual         | HIV Negative | 1969          | Other white        |             | 0           | 2                   | Y        | CR0 6     | 8987 7H43        | ERR234455 |
| LG0463 | 13/07/2004        | M      | Homosexual         | HIV Positive | 1967          | Other white        | NA          |             | 2                   | Y        | N134      | 8987 7H18        | ERR234430 |
| LG1295 | 30/09/2004        | M      | Homosexual         | HIV Negative | 1977          | Pakistani          | NA          |             | 9                   | N        | N8        | 8987 7H13        | ERR234425 |
| LG1757 | 12/11/2004        | M      | Homosexual         | HIV Positive | 1952          | Other white        |             | 0           | 2                   | N        | NW10 9    | 8987 7H55        | ERR234467 |
| LG1687 | 04/11/2004        | M      | Homosexual         | HIV Negative | 1972          | White British      |             | 3           | 0                   | Y        | SW10      | 8987 7H86        | ERR234498 |
| LG1630 | 04/11/2004        | M      | Homosexual         | HIV Negative | 1972          | White British      |             | 3           | 0                   | Y        | SW10      | 8987 7H46        | ERR234458 |
| LG12   |                   |        |                    |              |               |                    |             |             |                     |          |           |                  |           |
